# Supplementary material for: Structural Requirements for the Binding of a Peptide to Prohibitins on the Cell Surface of Monocytes/Macrophages
Source: MDPI journal article supplement (doi:10.3390/ijms23084282), 2022-04-13
Supplement: s1 [file s1]

## Supplementary Materials

Qindong Zhang, Anniken Olberg and Mouldy Sioud

Structural requirement for the binding of a peptide to prohibitins on the cell surface of monocytes/macrophages. *Int. J. Mol. Sci* 2022, **23**.

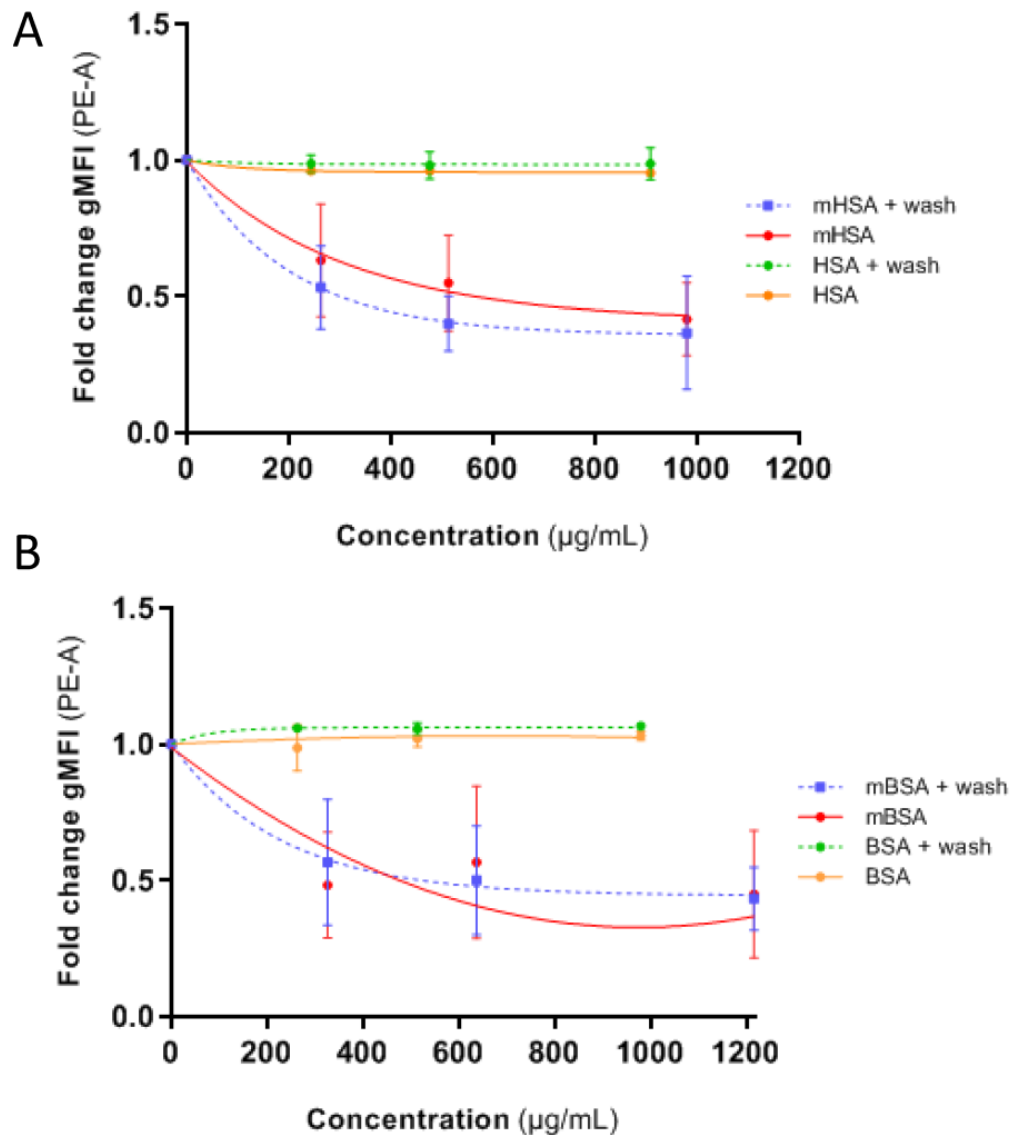

**Figure S1.** A summary of the competition assays with unmodified and maleic anhydride modified-albumin. Briefly, monocytes were incubated with unmodified or modified (m) HSA (A) for 30 min and washed or not prior to addition of biotinylated NW peptide. After incubation at 4° for 60 min, the cells were washed, stained with PE-streptavidin and then analyzed by flow cytometry. In (B), the cells were incubated with unmodified or modified BSA and processed as in A. Fold changes were calculated from geometric mean fluorescence intensity (gMFI). Average mean values and SD of 3 independent experiments are shown.

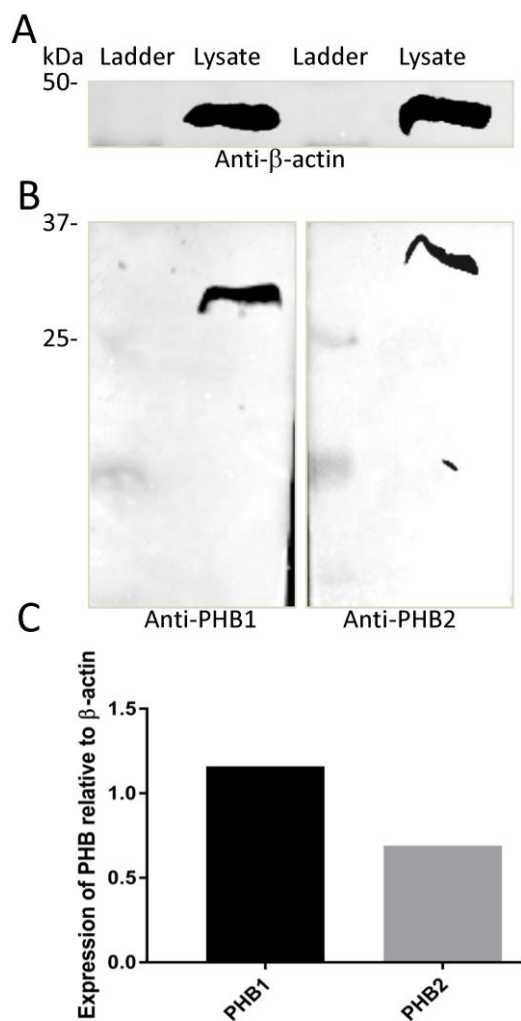

**Figure S2.** A representative western blot showing the expression of PHB proteins. Whole protein lysate was prepared from freshly isolated blood monocytes as described in Materials and Methods and then the expression of PHB1 and PHB2 (panel **B**) was analyzed by Western blotting with the indicated monoclonal antibodies. To control for protein loading, the upper part of the membrane was probed with an anti  $\beta$ -actin monoclonal antibody (panel **A**). The intensity of each bands was quantified with Image Lab 6.1 software. The ratio of the relative level of PHB1 and PHB2 to  $\beta$ -actin is shown in panel **C**.

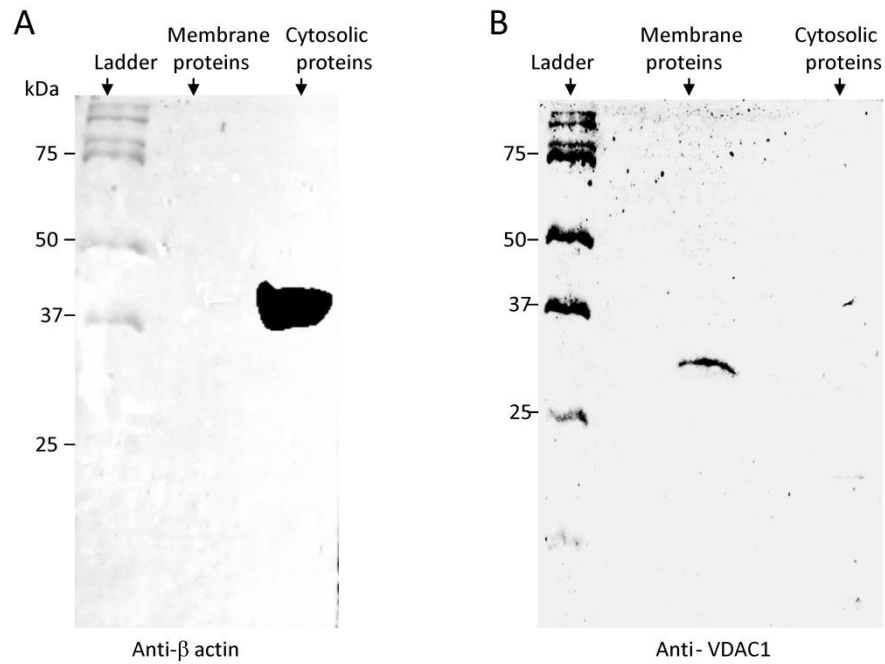

**Figure S3.** Purity analysis of the membrane and cytosolic protein fractions. Protein fractions were prepared from freshly isolated blood monocytes as described in Materials and Methods and then analyzed by Western blots for the presence of  $\beta$ -actin (**A**) and voltage-dependent anion selective channel 1 (VDAC1) (**B**) using specific monoclonal antibodies. As expected,  $\beta$ -actin was only detected in the cytoplasmic fraction, whereas VDAC1 was detected only in the membrane fraction. Thus, pure cytoplasmic and membrane fractions have been isolated.

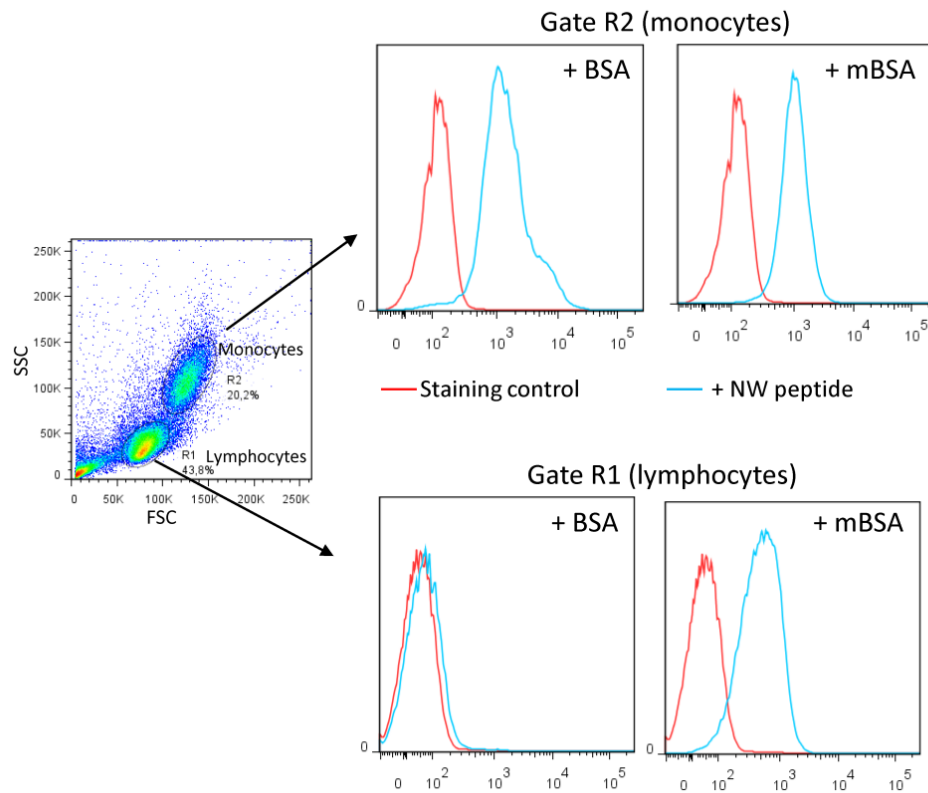

**Figure S4.** Treatment of peripheral mononuclear cells (PBMCs) with maleic anhydride modified-albumin conferred binding of the NW peptide to the lymphocyte population. PBMCs were incubated with approximately 1 mg/ml unmodified BSA or modified BSA (mBSA) for 30 minutes, prior to addition of biotinylated NW peptide (0.4  $\mu\text{g}/\mu\text{l}$ ). The cells were then washed, stained with PE-streptavidin and analyzed by flow cytometry. The fluorescent intensity of gated cell populations under different treatment conditions is indicated. The data are representative of 4 independent experiments.

**Table S1.** Peptide sequences

| Peptide   | Sequence                               | Purity% | m/Z     |
|-----------|----------------------------------------|---------|---------|
| NW        | NWYLPWLGTNDW                           | 97.9    | 783.20  |
| NW-N1A    | <b>A</b> WYLPWLGTNDW                   | 92.53   | 767.16  |
| NW-W2A    | N <b>A</b> YLPWLGTNDW                  | 96.69   | 788.22  |
| NW-Y3A    | NW <b>A</b> LPWLGTNDW                  | 96.37   | 790.32  |
| NW-L4A    | NWY <b>A</b> PWLGTNDW                  | 96.07   | 800.51  |
| NW-P5A    | NWYL <b>A</b> WLGTNDW                  | 94.39   | 799.25  |
| NW-W6A    | NWYLP <b>A</b> LGTNDW                  | 85.2    | 812.22  |
| NW-L7A    | NWYLPW <b>A</b> GTNDW                  | 97.1    | 815.45  |
| NW-G8A    | NWYLPWL <b>A</b> TNDW                  | 95.13   | 799.51  |
| NW-T9A    | NWYLPWL <b>G</b> ANDW                  | 95.47   | 815.33  |
| NW-N10A   | NWYLPWLGT <b>A</b> DW                  | 85.76   | 850.61  |
| NW-D11A   | NWYLPWLGTN <b>A</b> W                  | 87.95   | 799.65  |
| NW-W12A   | NWYLPWLGTND <b>A</b>                   | 92.31   | 814.34  |
| NW-FFF    | N <b>F</b> YLP <b>F</b> LGTND <b>F</b> | 86.13   | 724.80  |
| NW-YYY    | N <b>Y</b> YLP <b>Y</b> LGTND <b>Y</b> | 98.19   | 749.00  |
| NW-VV     | NWY <b>V</b> PW <b>V</b> GTNDW         | 87.37   | 766.79  |
| NW-AA     | NWYLPWLGT <b>AA</b> W                  | 90.21   | 1479.25 |
| NW-10     | NWYLPWLGTW                             | 95.72   | 1337.12 |
| NW-Biotin | NWYLPWLGTNDWGGGK-Biotin                | 90.13   | 1044.26 |

**Table S2.** List of antibodies used in Western blotting

| Antibodies                 | Species | Type       | Dilution | Supplier    | Catalogue number |
|----------------------------|---------|------------|----------|-------------|------------------|
| Albumin                    | Rabbit  | Polyclonal | 1:5000   | Proteintech | 16475-1-AP       |
| PHB1                       | Rabbit  | Polyclonal | 3:5000   | GeneTex     | GTX101105        |
| PHB2                       | Rabbit  | Polyclonal | 3:5000   | GeneTex     | GTX102100        |
| Anti-rabbit IgG (H+L), HRP | Donkey  | Polyclonal | 1:1000   | Invitrogen  | SA1-200          |
| Anti-human IgG, HRP        | Rabbit  | Polyclonal | 1:1000   | Dako        | P0214            |

**Table S3.** List of antibodies used in immunofluorescence studies

| Antibodies                              | Species | Type       | Dilution | Supplier       | Catalogue number |
|-----------------------------------------|---------|------------|----------|----------------|------------------|
| Albumin                                 | Rabbit  | Polyclonal | 1:500    | Proteintech    | 16475-1-AP       |
| Receptor tyrosine-protein kinase erbB-2 | Rabbit  | Polyclonal | 1:500    | Santa Cruz     | sc284            |
| Streptavidin, PE                        | -       | -          | 1:300    | BD Pharmingen™ | 554061           |
| Anti-rabbit IgG, AF647                  | Donkey  | Polyclonal | 1:300    | Abcam          | Ab150075         |
| Anti-human prohibitin                   | Mouse   | Monoclonal | 1:1000   | Merk Millipore | MABE983          |
| Anti-mouse IgG, FITC                    | Goat    | Polyclonal | 1:300    | Sigma-Aldrich  | F5387            |
